# Supplementary material for: An in silico investigation of menthol metabolism
Source: PLOS journal article supplement (doi:10.1371/journal.pone.0216577), 2019-09-27

Abbreviations for the nomenclature of menthol metabolites referred to by the present study  
and  
a list of 102 compounds in this study grouped by molecular formula

| Position \ Group | 3                                                         | 7          | 8 | 9            | 10 |
|------------------|-----------------------------------------------------------|------------|---|--------------|----|
| Original form    | o                                                         | e          | e | e            | e  |
| Alkane           | -                                                         | e          | e | e            | e  |
| Alcohol          | o                                                         | o          | o | <u>o</u>     | o  |
| Aldehyde         | y                                                         | <u>y</u>   | - | <u>y</u>     | y  |
| Carboxylic acid  | -                                                         | <u>x</u>   | - | <u>x</u>     | -  |
| Dehydration      | -4D for four-membered ring formation at positions 3 and 8 |            |   |              |    |
| Aldol reaction   | -5A for four-membered ring formation at positions 3 and 9 |            |   |              |    |
| Glucuronic acid  | O                                                         | <u>O,X</u> | - | <u>O,X,Y</u> | -  |
| Sulfate group    | s                                                         | -          | - | -            | -  |

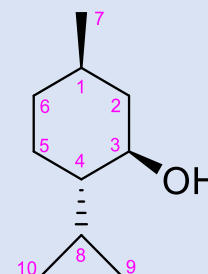

- An underlined indicates that there are *R* and *S* stereoisomers due to the substitution.
- Substitution at position 9 leads to a new chiral center if it is not the same as 10.
- Substitution at position 10 is forced to have lower or the same oxidation state for the carbon atom when compared to position 9.
- Dashes are where substitution with the functional group at that respective position cannot occur

formula: C<sub>10</sub>H<sub>20</sub>O (molar mass 156.26, total 1 compound)

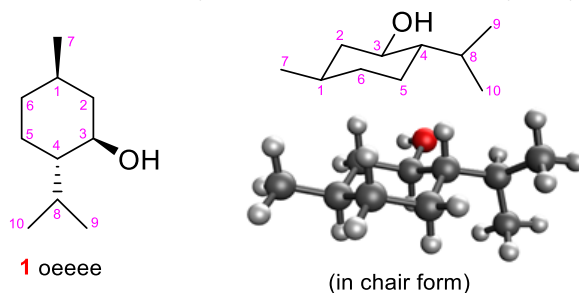

formula: C<sub>10</sub>H<sub>20</sub>O<sub>2</sub> (molar mass 172.26, total 4 compounds)

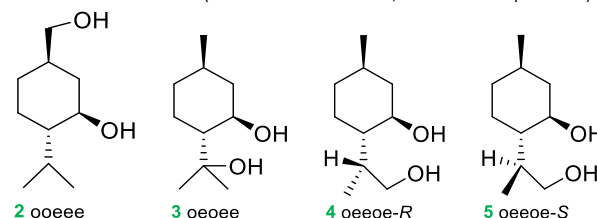

formula: C<sub>10</sub>H<sub>20</sub>O<sub>3</sub> (molar mass 188.26, total 6 compounds)

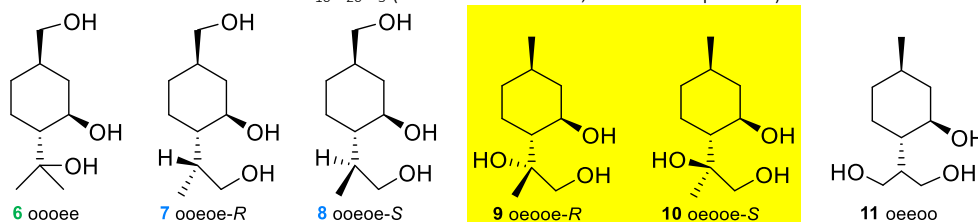

formula: C<sub>10</sub>H<sub>18</sub>O<sub>2</sub> (molar mass 170.25, total 4 compounds)

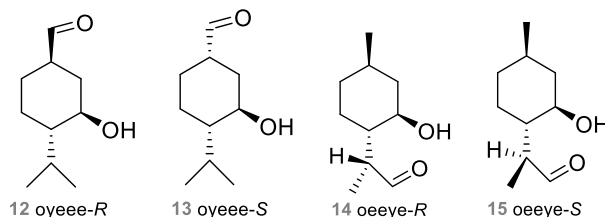

formula:  $C_{10}H_{18}O_3$  (molar mass 186.25, total 28 compounds)

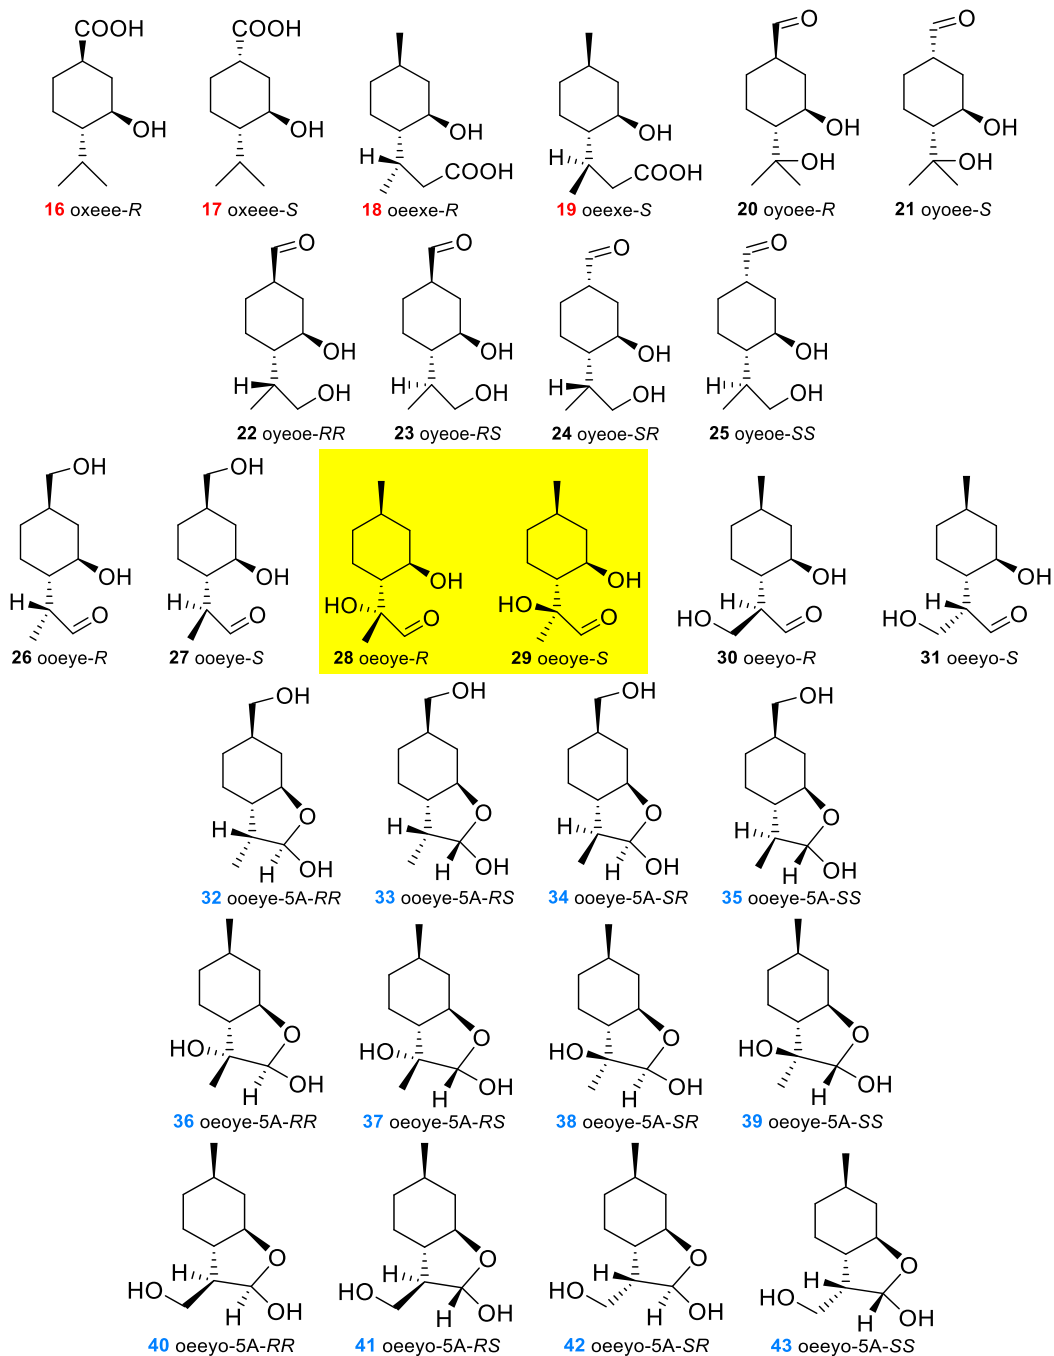

formula:  $C_{10}H_{18}O_4$  (molar mass 202.25, total 2 compounds)

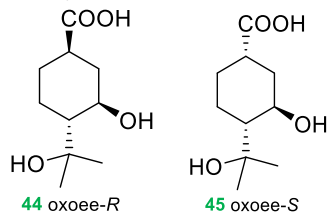

formula: C<sub>10</sub>H<sub>16</sub>O<sub>3</sub> (molar mass 184.23, total 5 compounds)

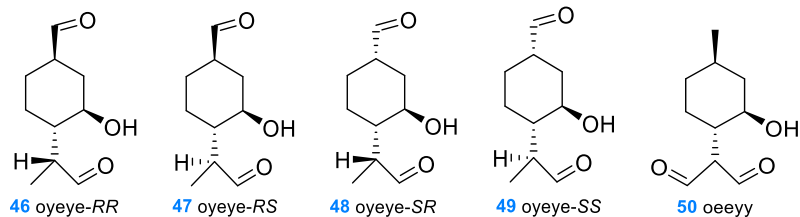

formula: C<sub>10</sub>H<sub>18</sub>O (molar mass 154.25, total 1 compound)

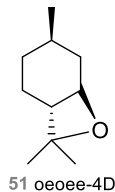

formula: C<sub>10</sub>H<sub>18</sub>O<sub>2</sub> (molar mass 170.25, total 1 compound)

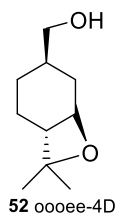

formula: C<sub>10</sub>H<sub>16</sub>O<sub>2</sub> (molar mass 168.23, total 2 compounds)

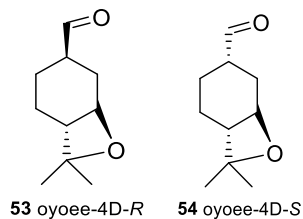

formula: C<sub>10</sub>H<sub>16</sub>O<sub>3</sub> (molar mass 184.23, total 2 compounds)

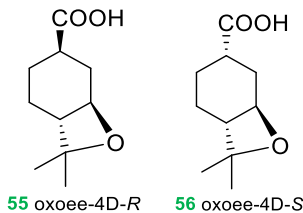

formula: C<sub>10</sub>H<sub>20</sub>O<sub>4</sub>S (molar mass 236.33, total 1 compound)

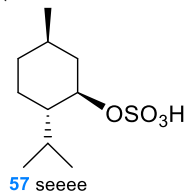

formula: C<sub>10</sub>H<sub>20</sub>O<sub>5</sub>S (molar mass 252.33, total 3 compounds)

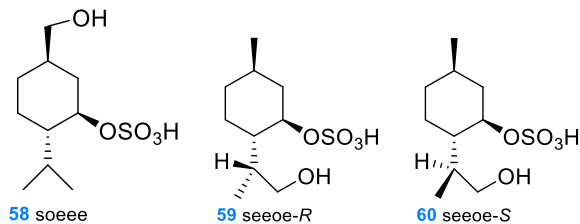

formula: C<sub>10</sub>H<sub>20</sub>O<sub>6</sub>S (molar mass 268.33, total 2 compounds)

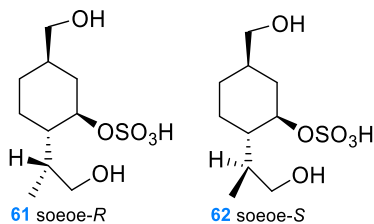

formula: C<sub>16</sub>H<sub>28</sub>O<sub>7</sub> (molar mass 332.39, total 1 compound)

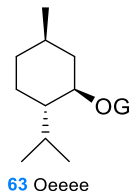

formula: C<sub>16</sub>H<sub>28</sub>O<sub>8</sub> (molar mass 348.39, total 8 compounds)

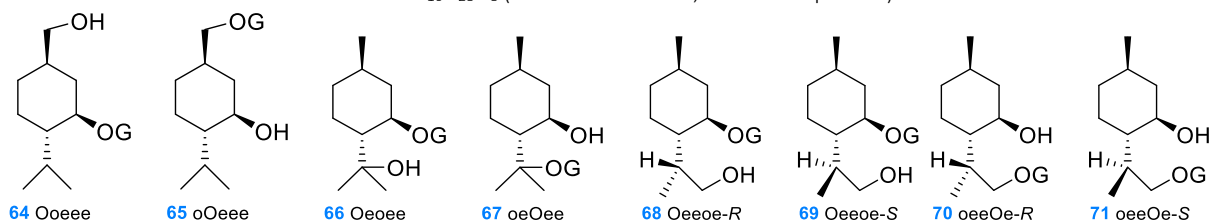

formula: C<sub>16</sub>H<sub>28</sub>O<sub>9</sub> (molar mass 364.39, total 6 compounds)

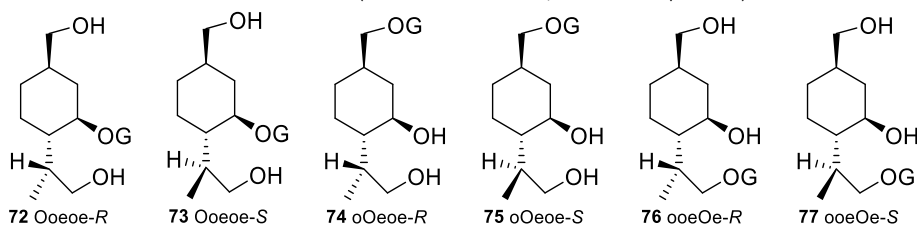

formula: C<sub>16</sub>H<sub>26</sub>O<sub>8</sub> (molar mass 346.37, total 4 compounds)

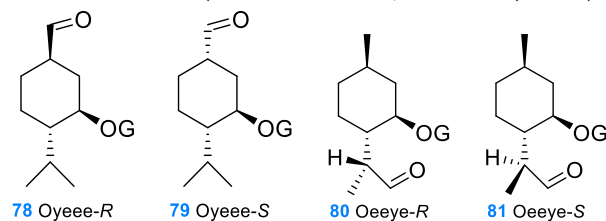

formula: C<sub>16</sub>H<sub>26</sub>O<sub>9</sub> (molar mass 362.37, total 16 compounds)

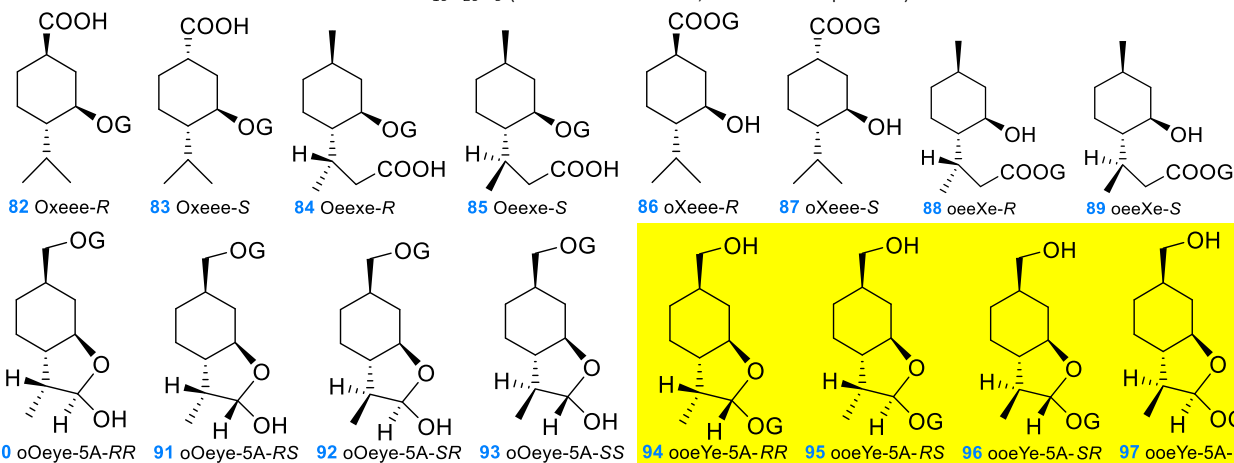

formula:  $C_{16}H_{24}O_9$  (molar mass 360.36, total 5 compounds)

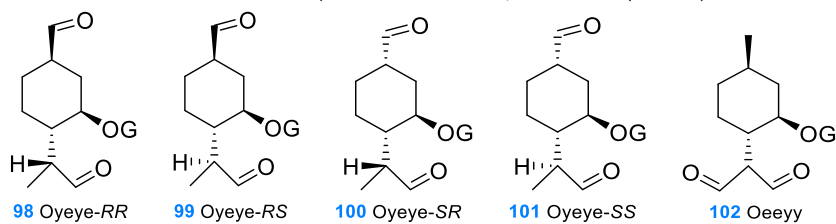

#### Notes

- Compounds are highlighted in yellow when their *RS* designator changes from their parent compounds.
- G stands for a glucuronyl group:

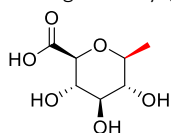

Supplement: S4 (10.1371/journal.pone.0216577.s004) [file journal.pone.0216577.s004]
